# Supplementary material
Source: MDPI journal article supplement (https://www.mdpi.com/2220-9964/11/10/532)
Supplement: s1 [file s1 › ijgi-1909724-supplementary.pdf]

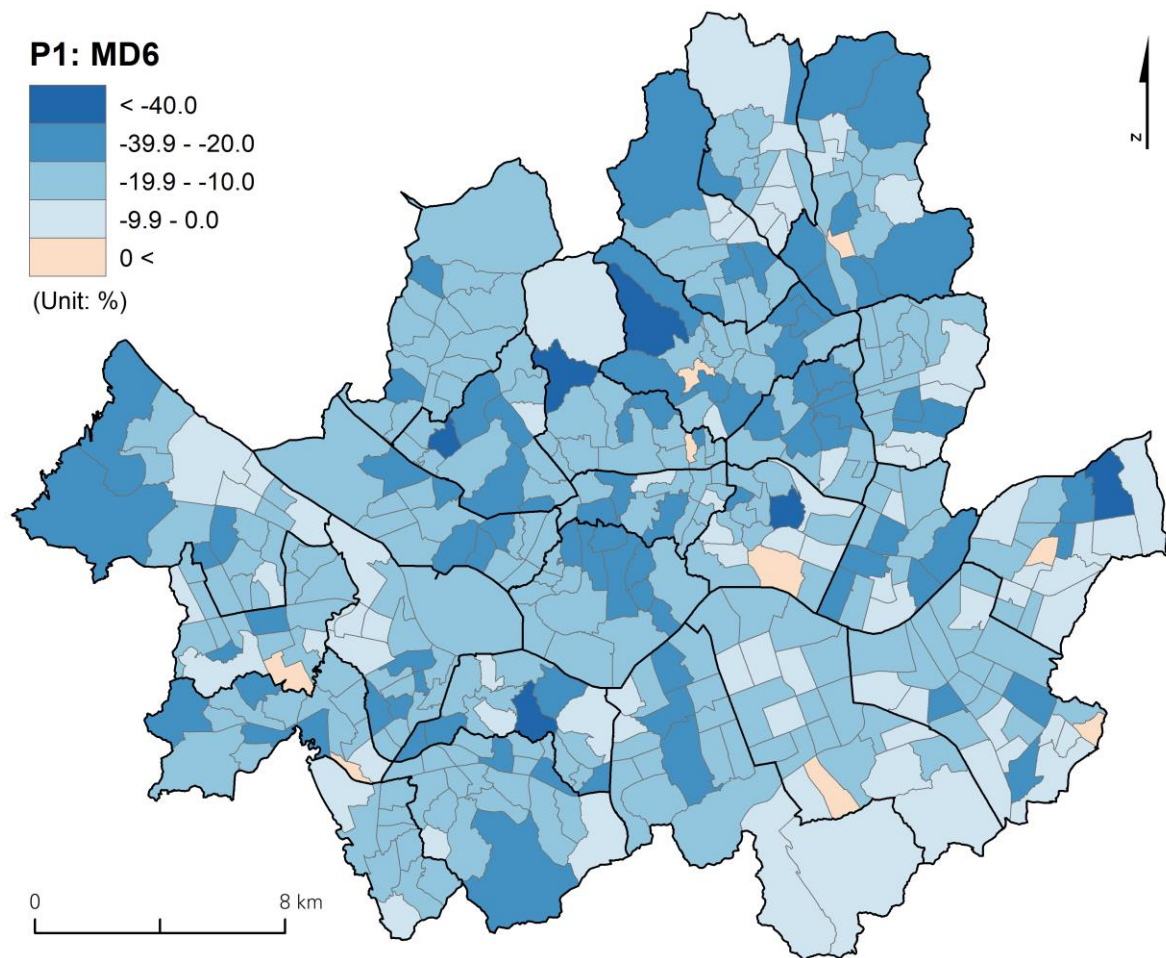

**Figure S1**

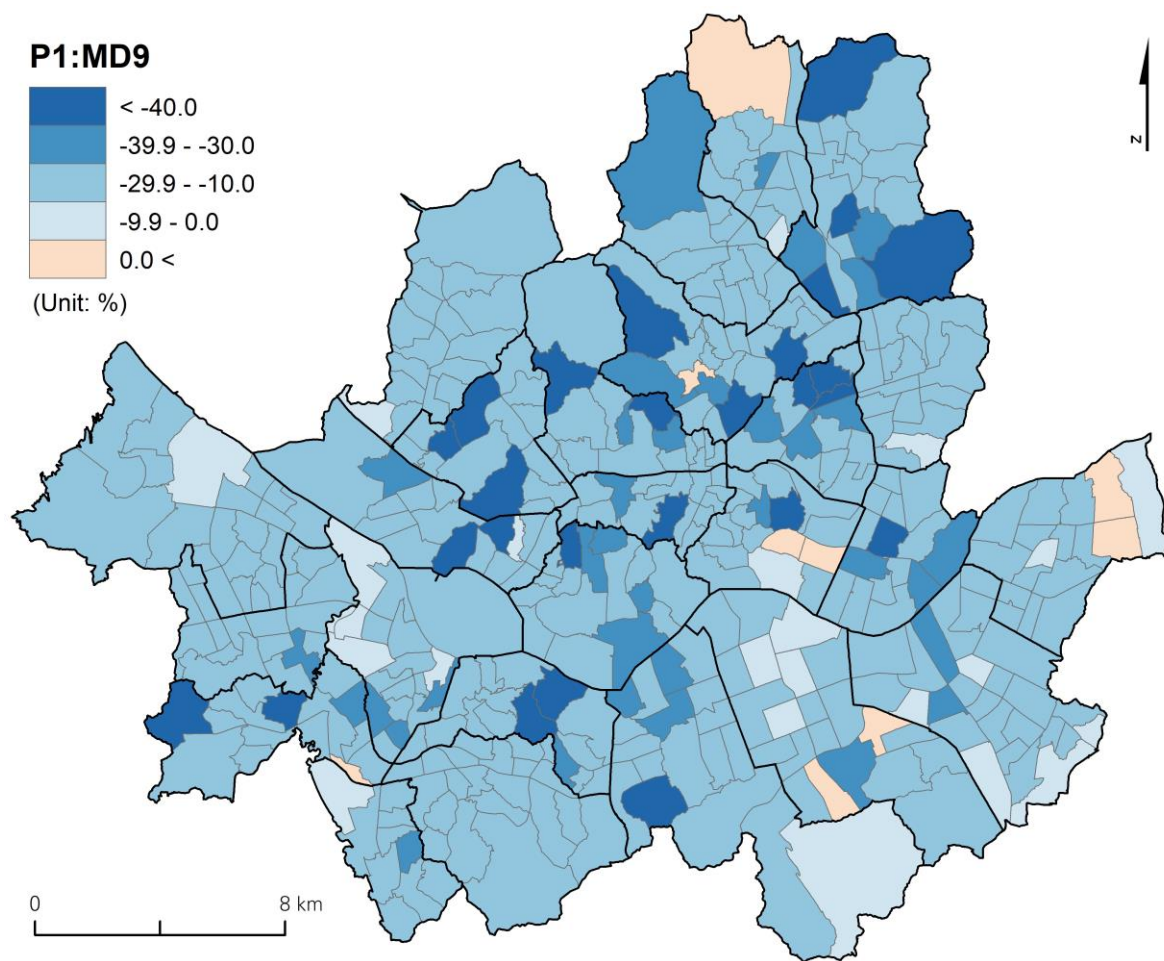

**Figure S2**

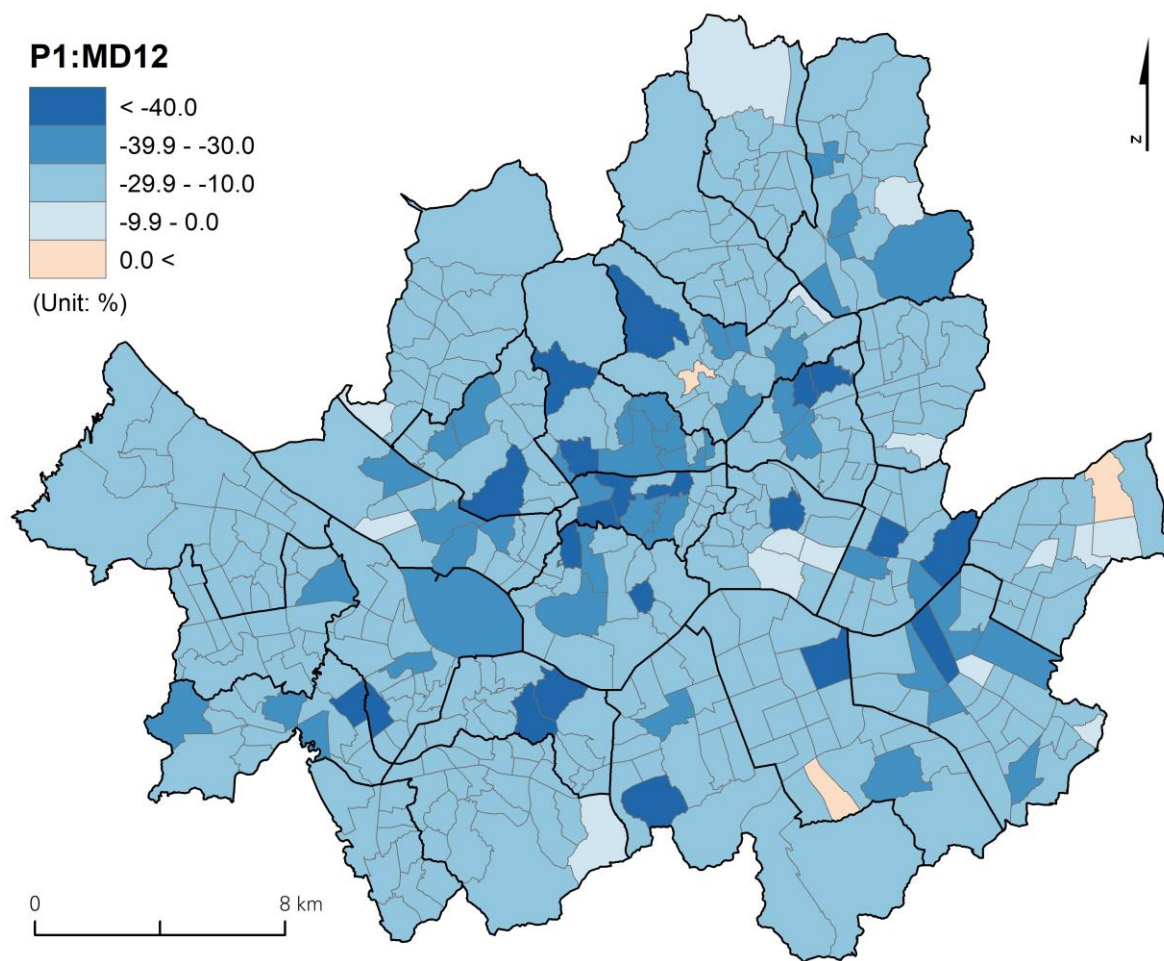

**Figure S3**

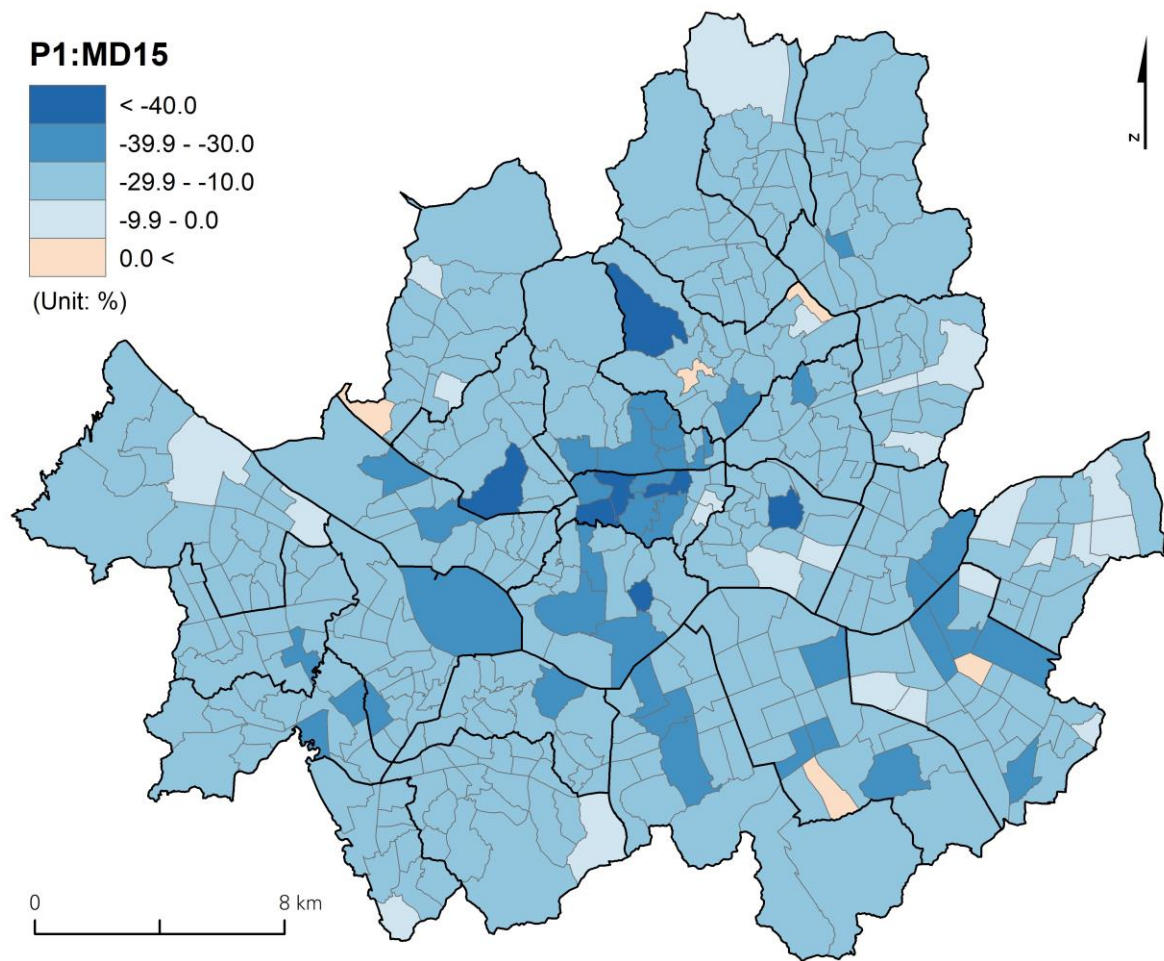

**Figure S4**

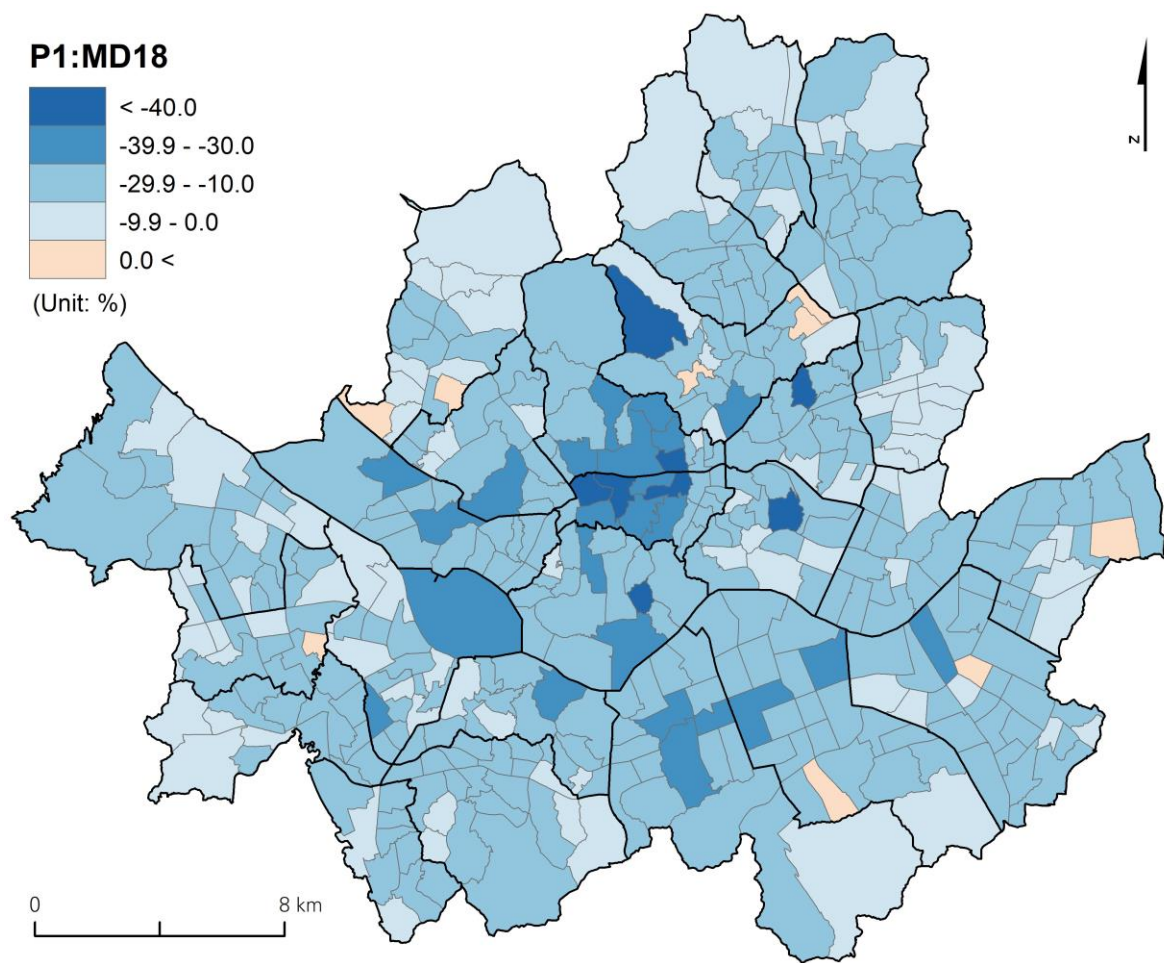

**Figure S5**

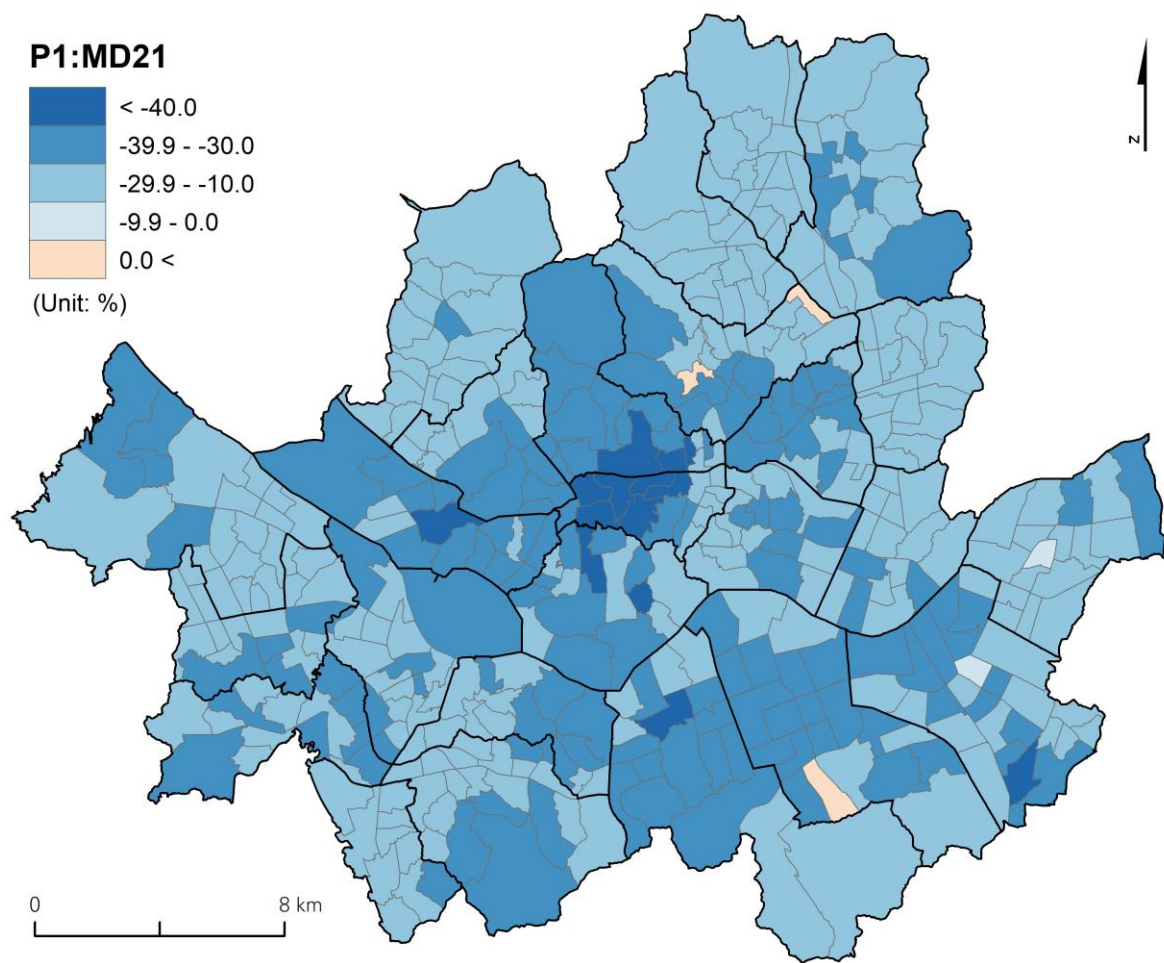

**Figure S6**

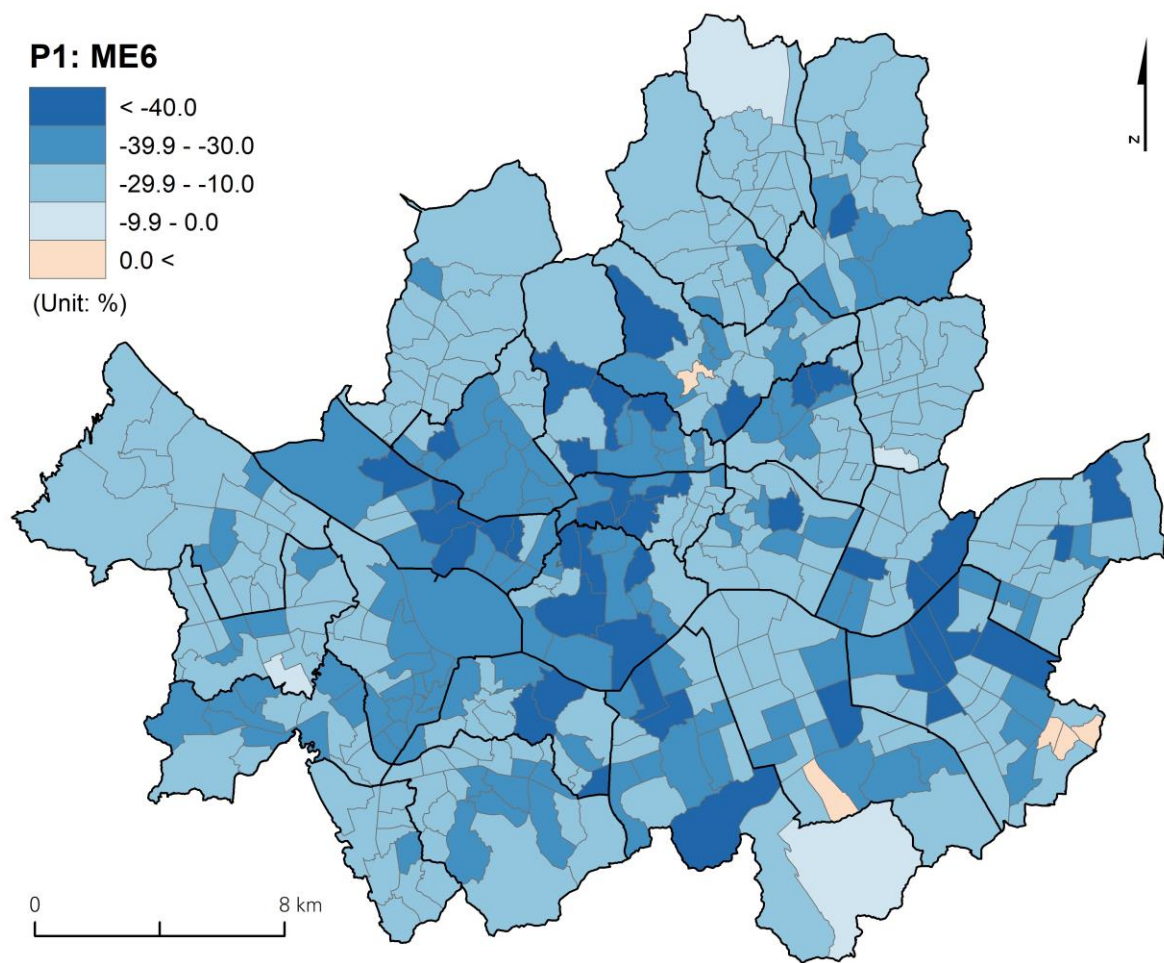

**Figure S7**

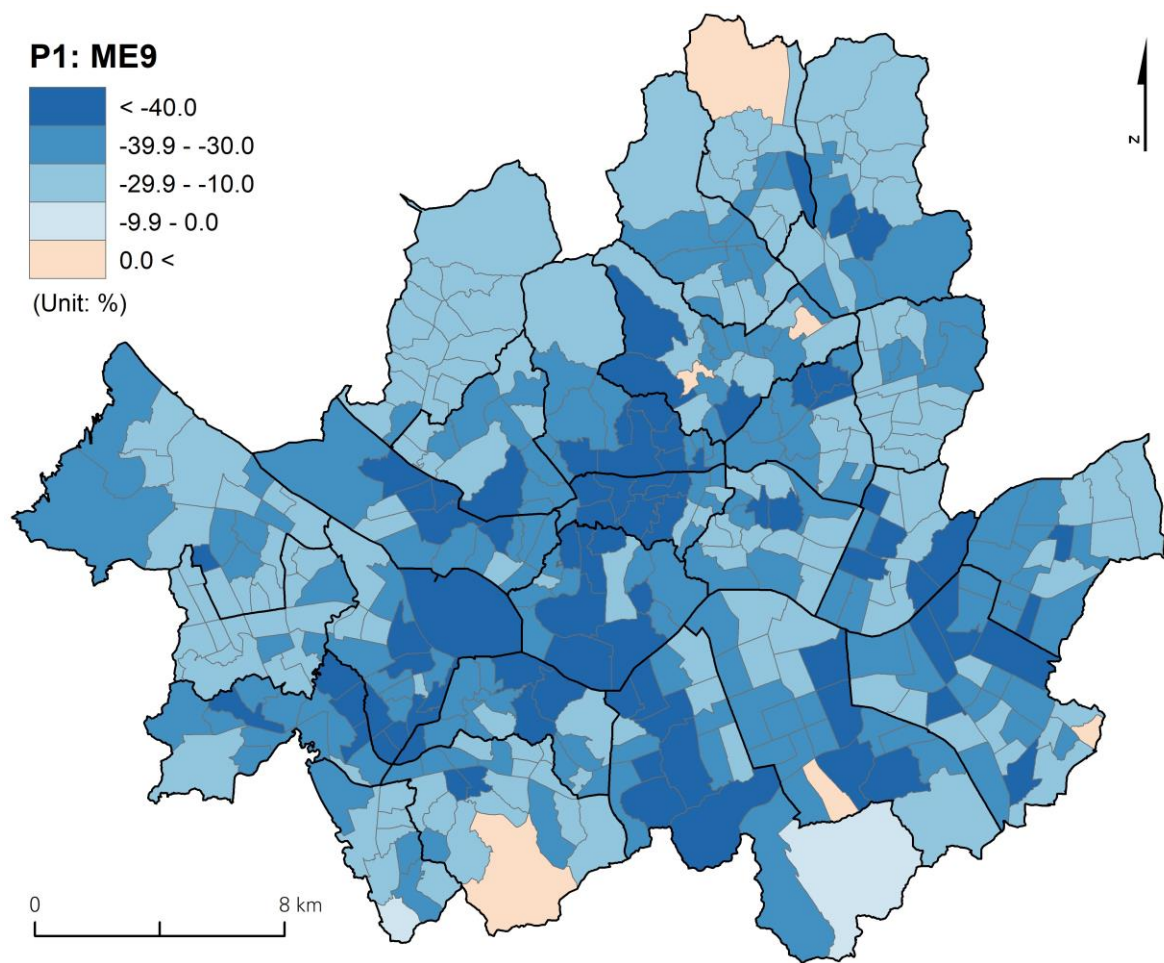

**Figure S8**

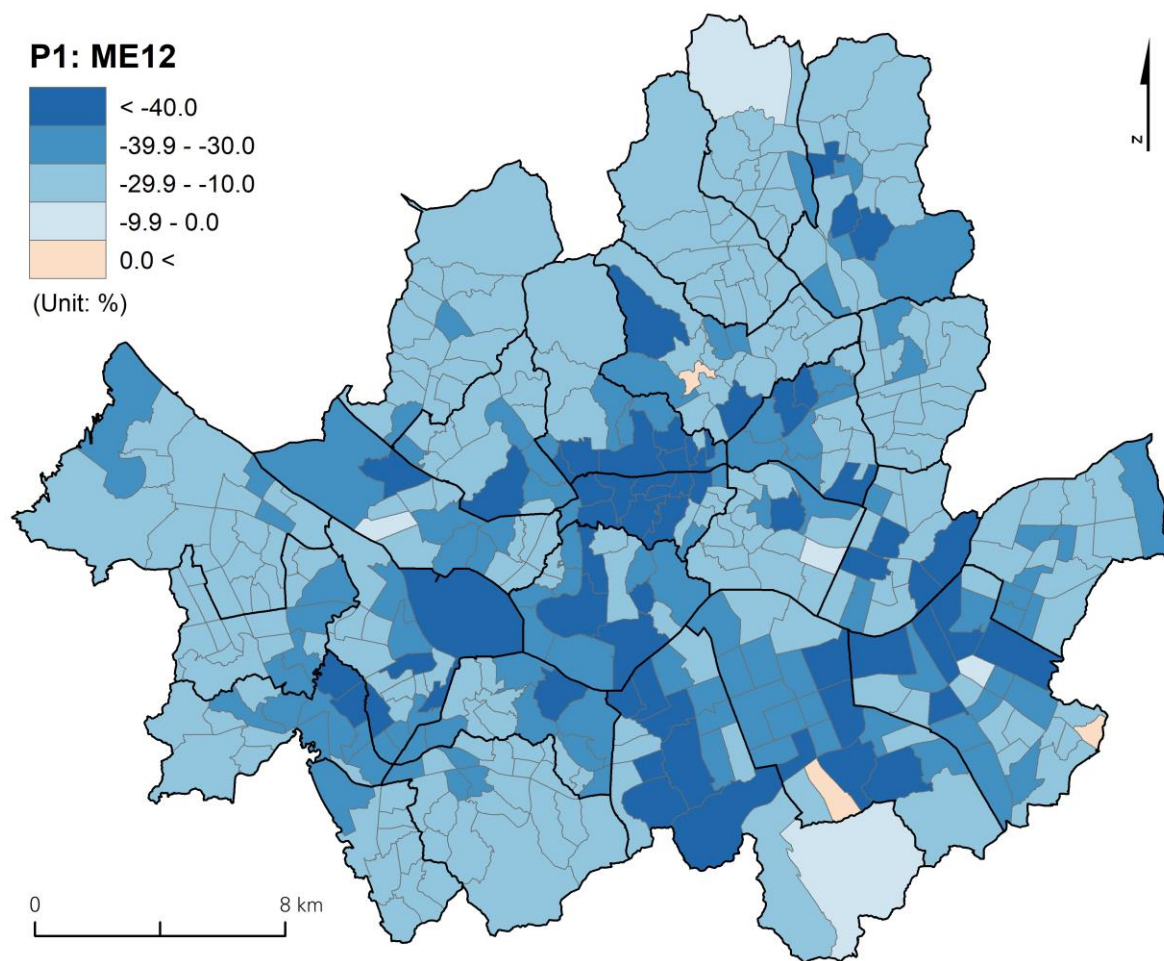

**Figure S9**

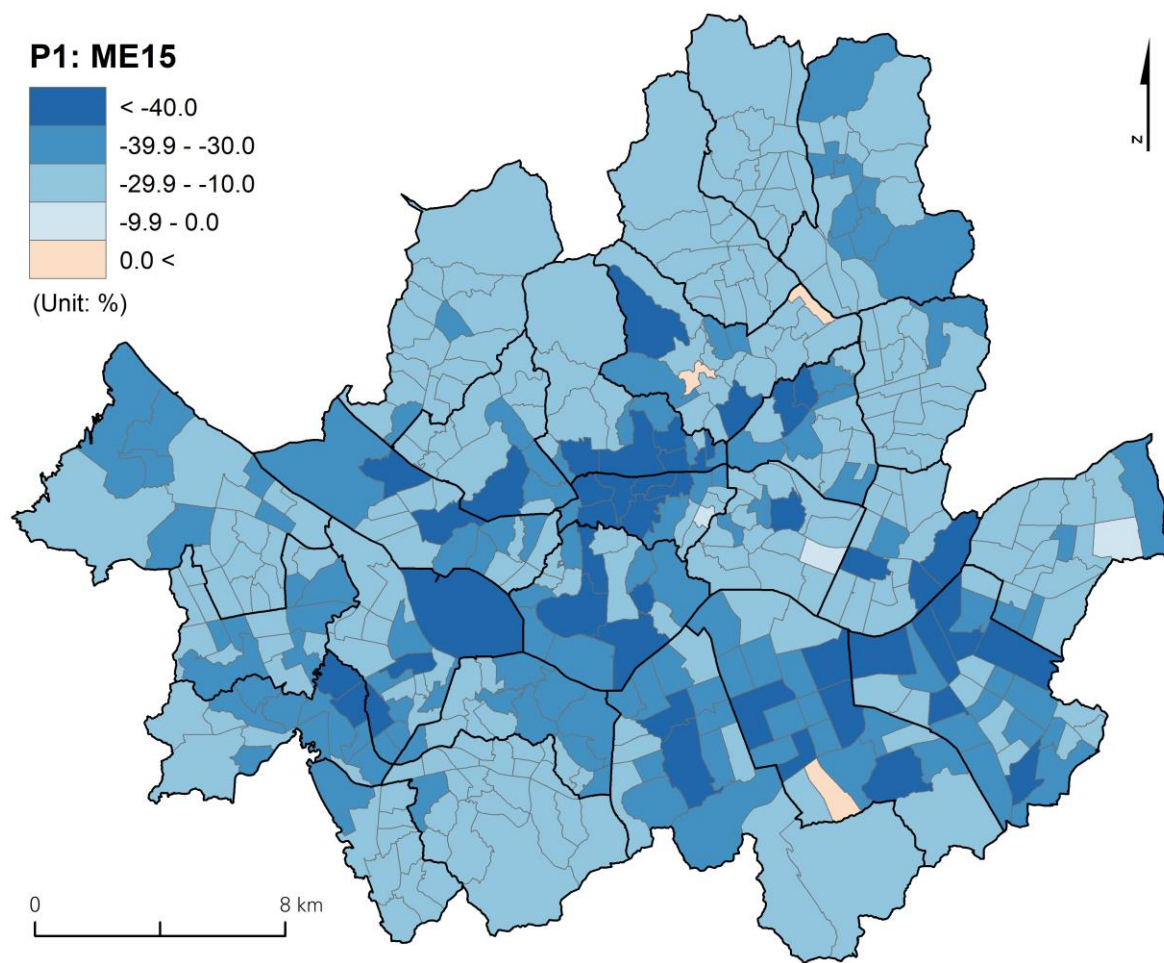

**Figure S10**

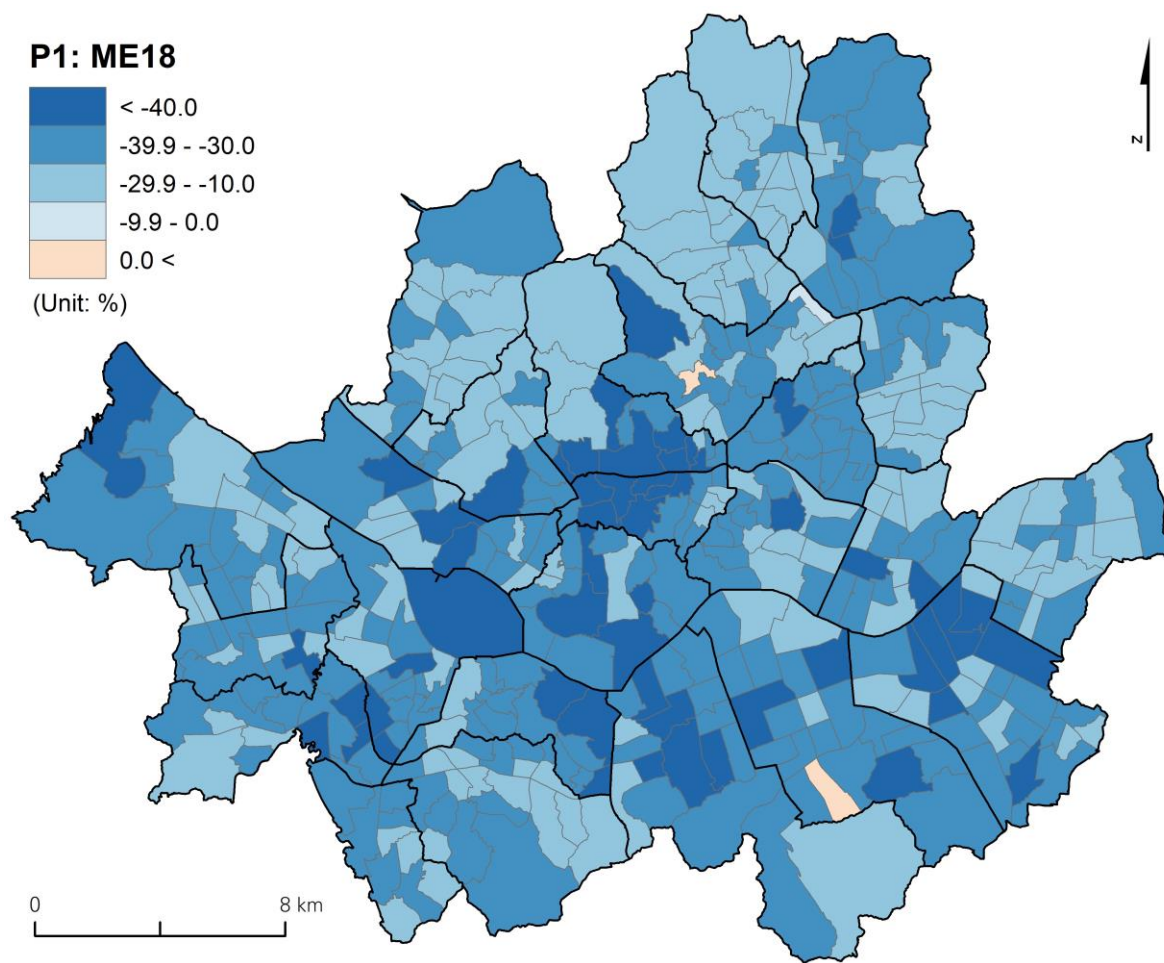

**Figure S11**

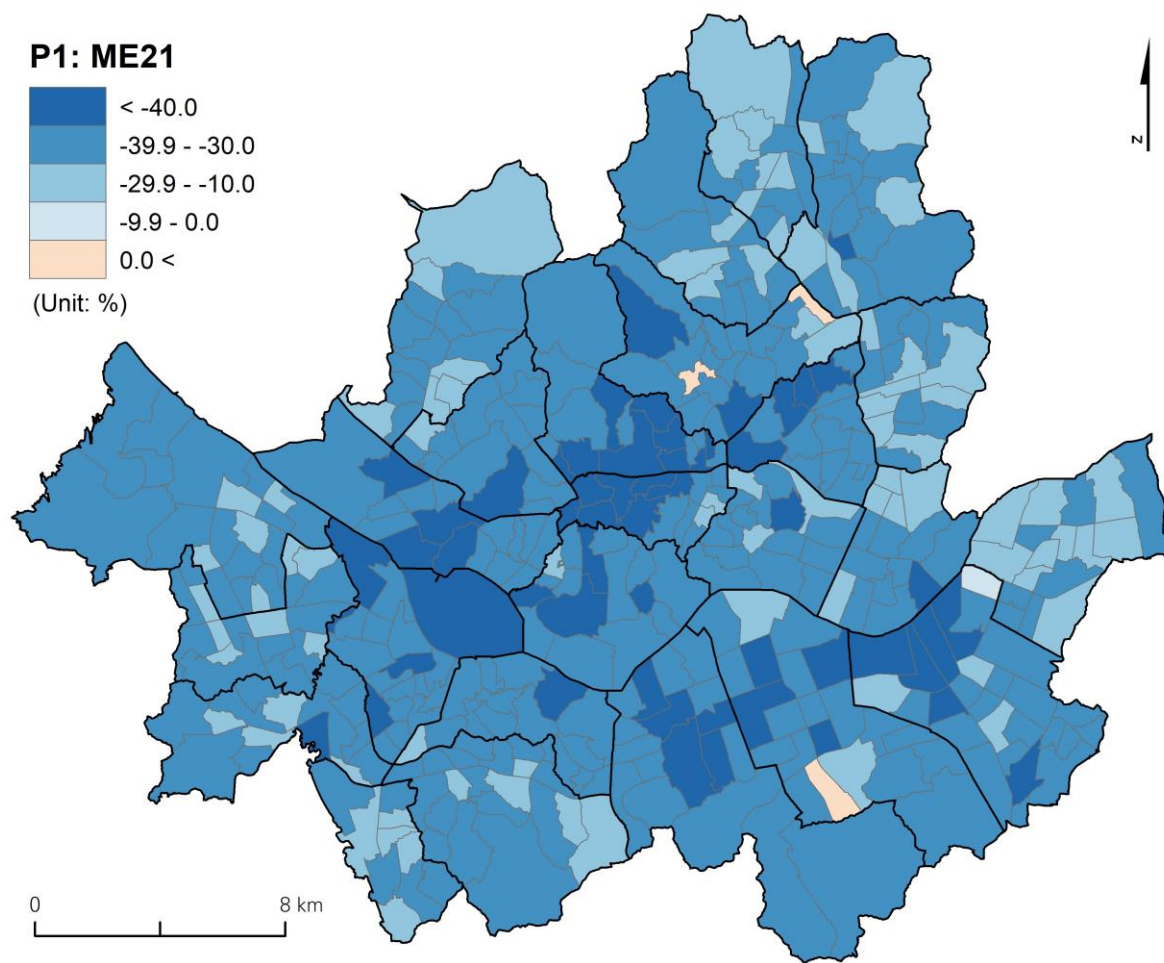

**Figure S12**

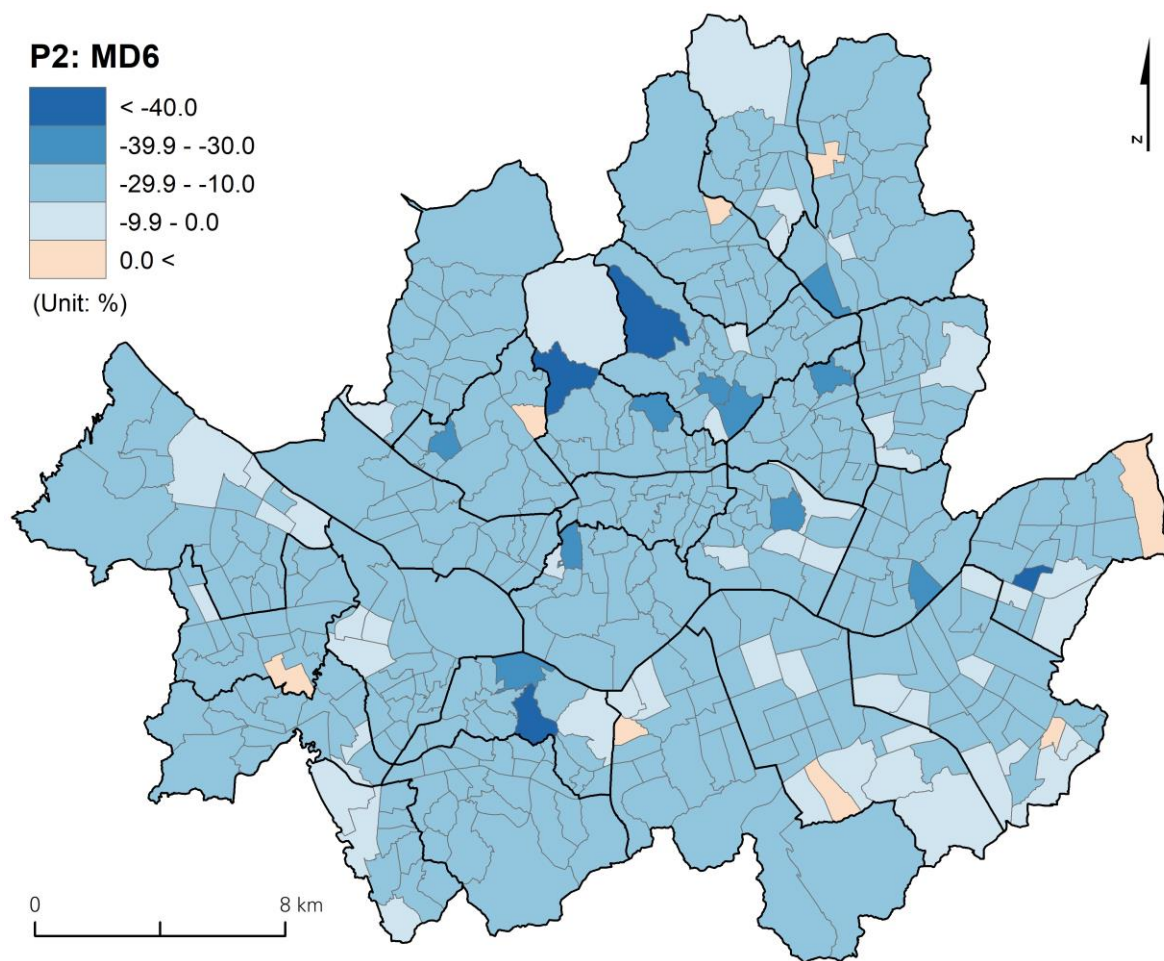

**Figure S13**

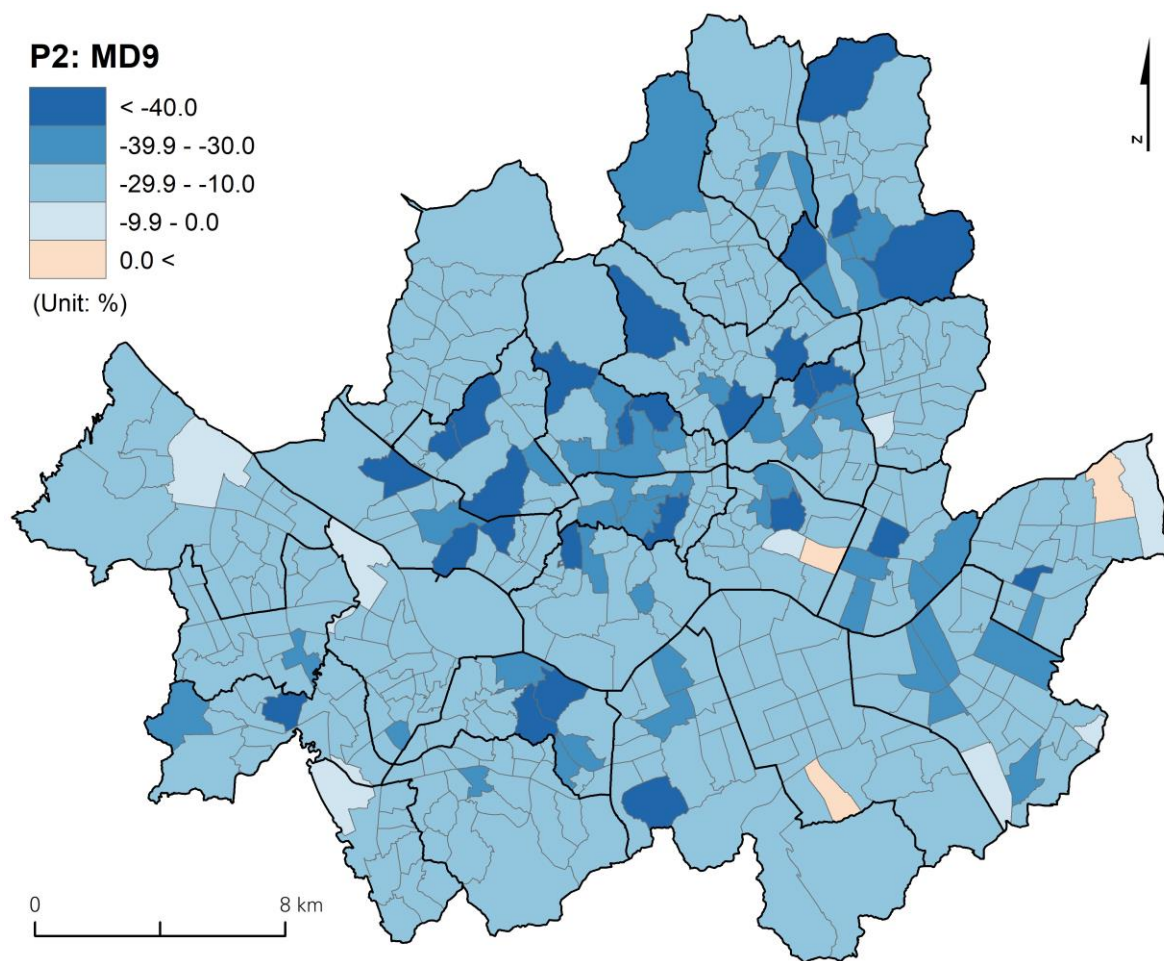

**Figure S14**

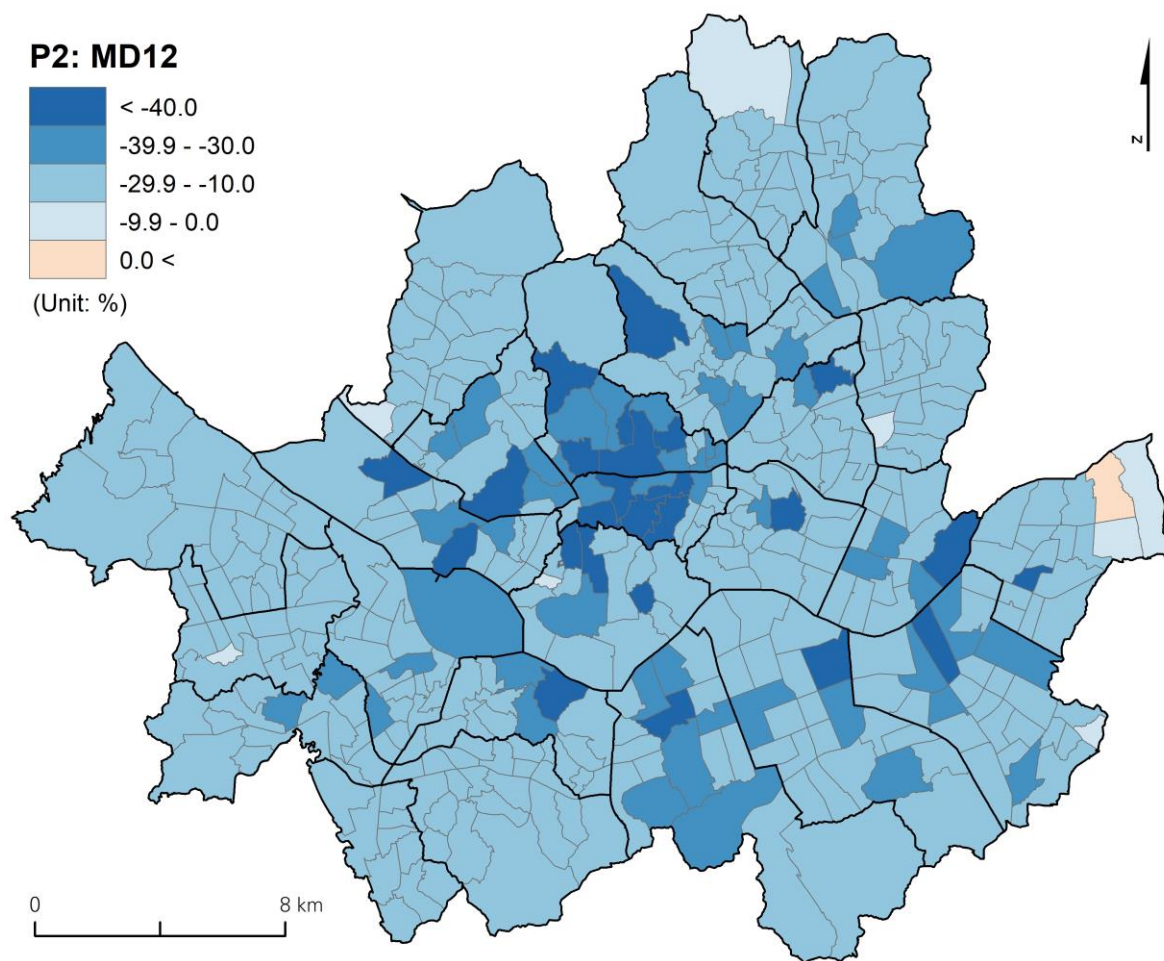

**Figure S15**

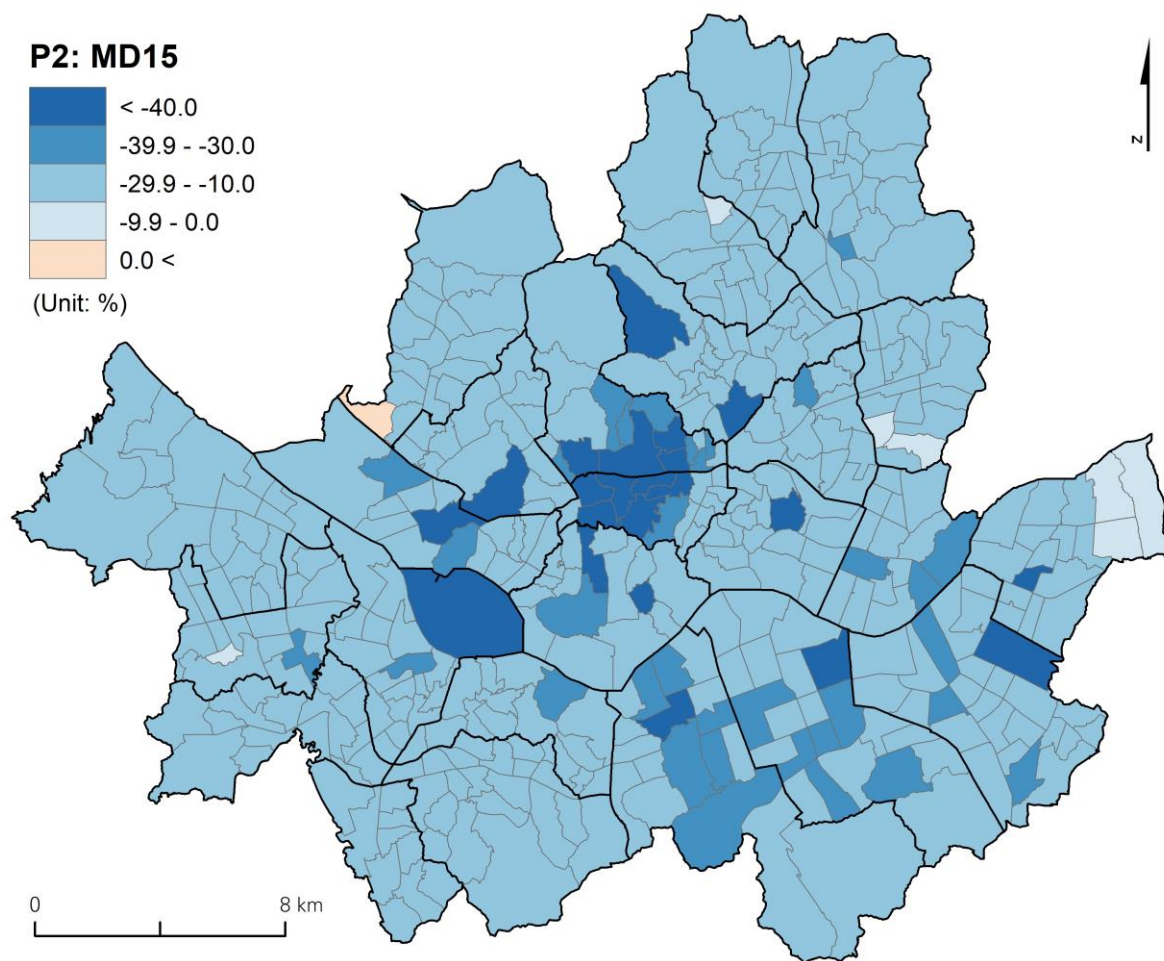

**Figure S16**

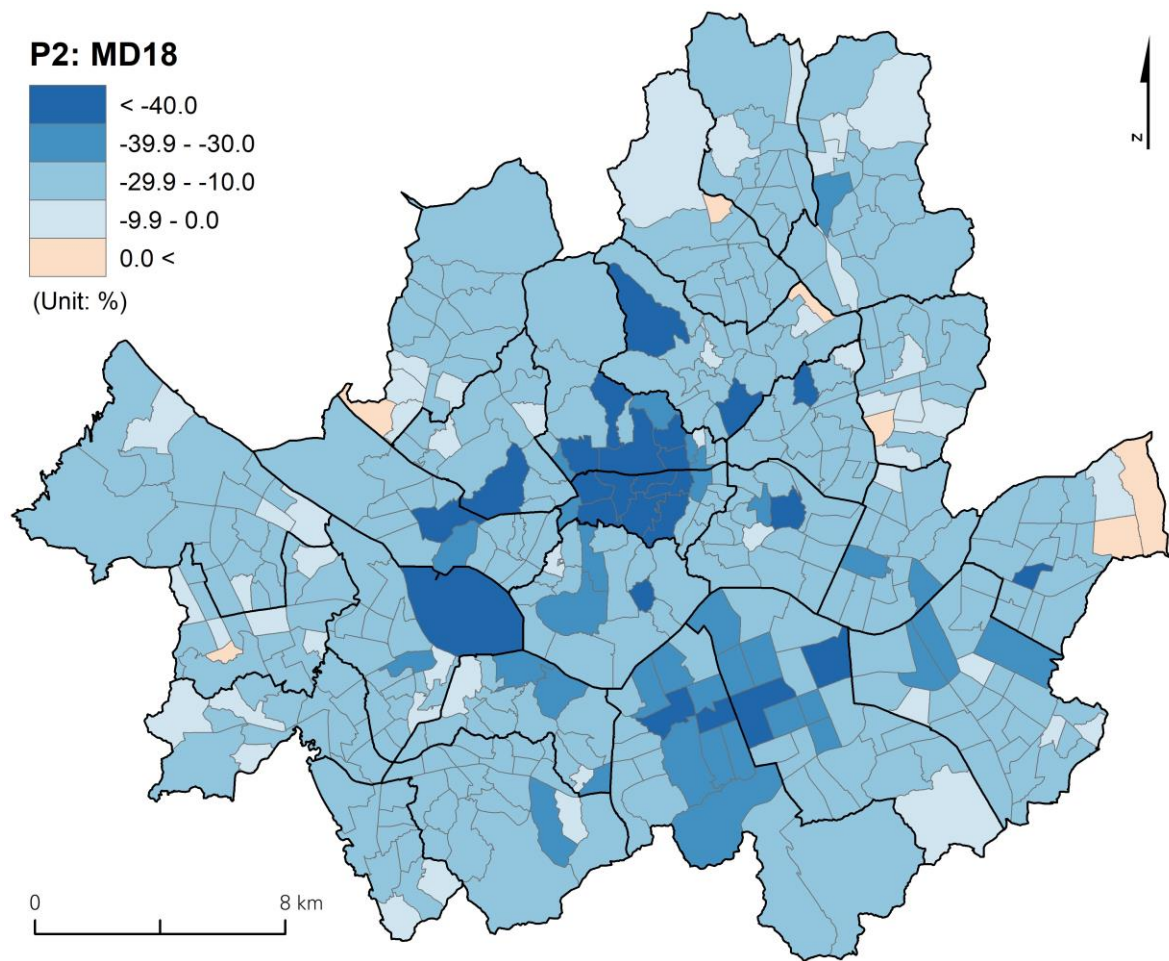

**Figure S17**

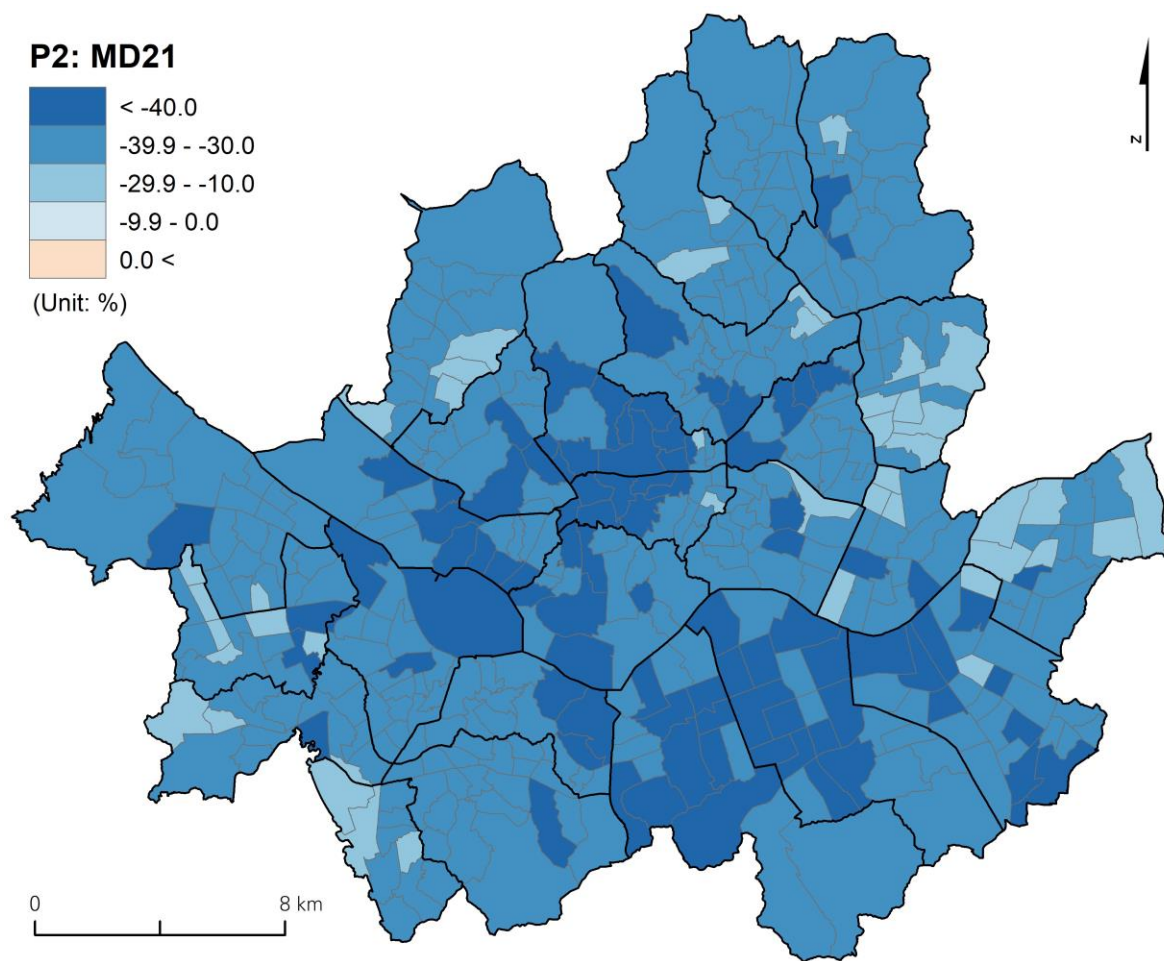

**Figure S18**

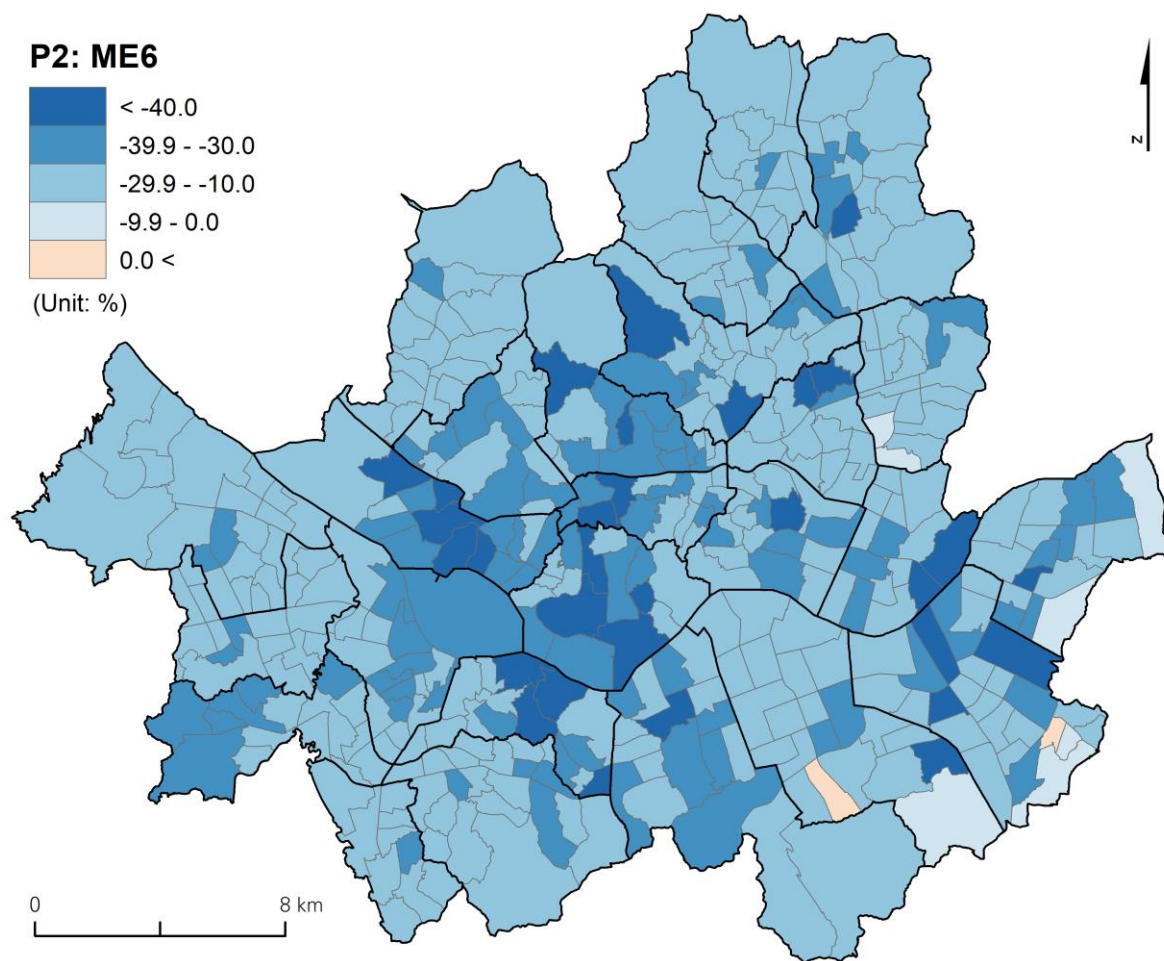

**Figure S19**

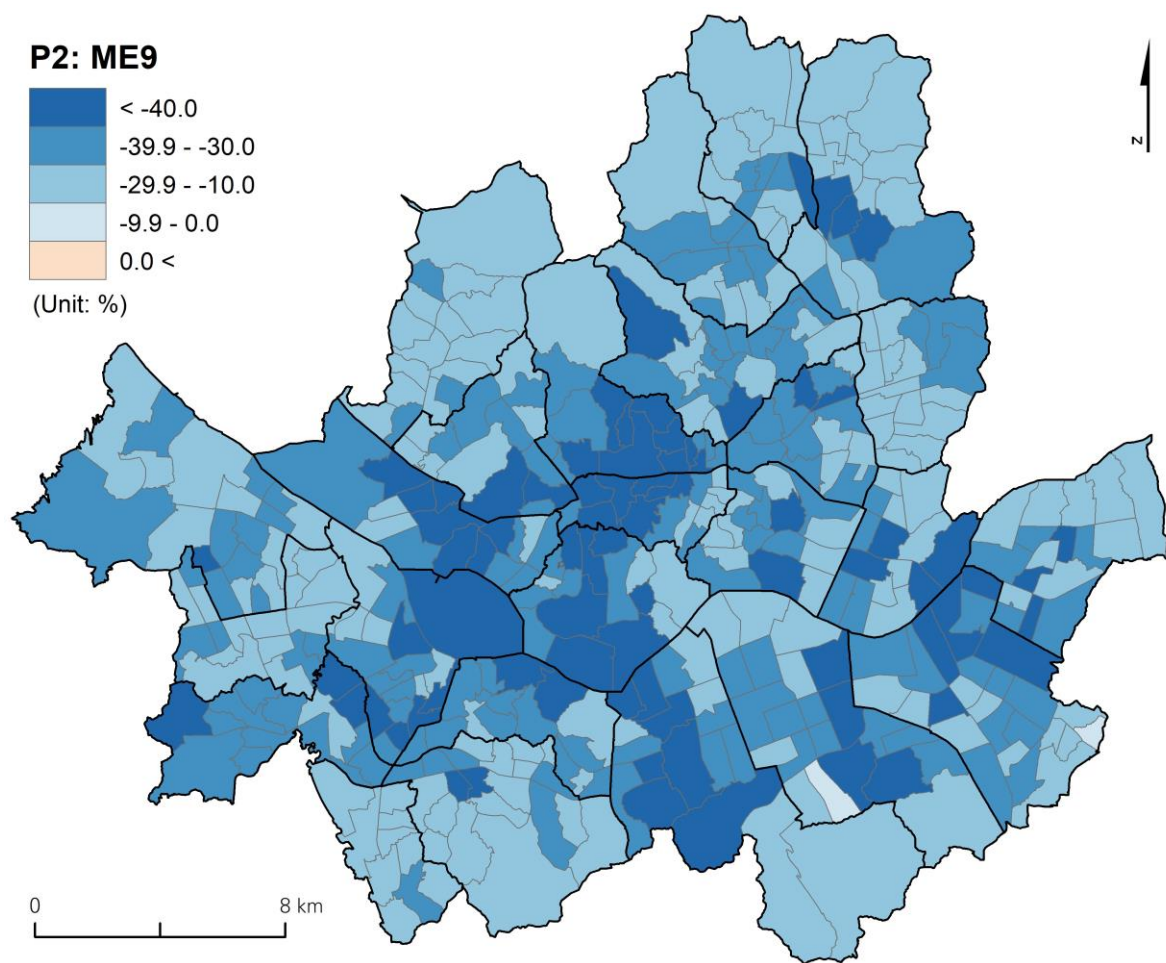

**Figure S20**

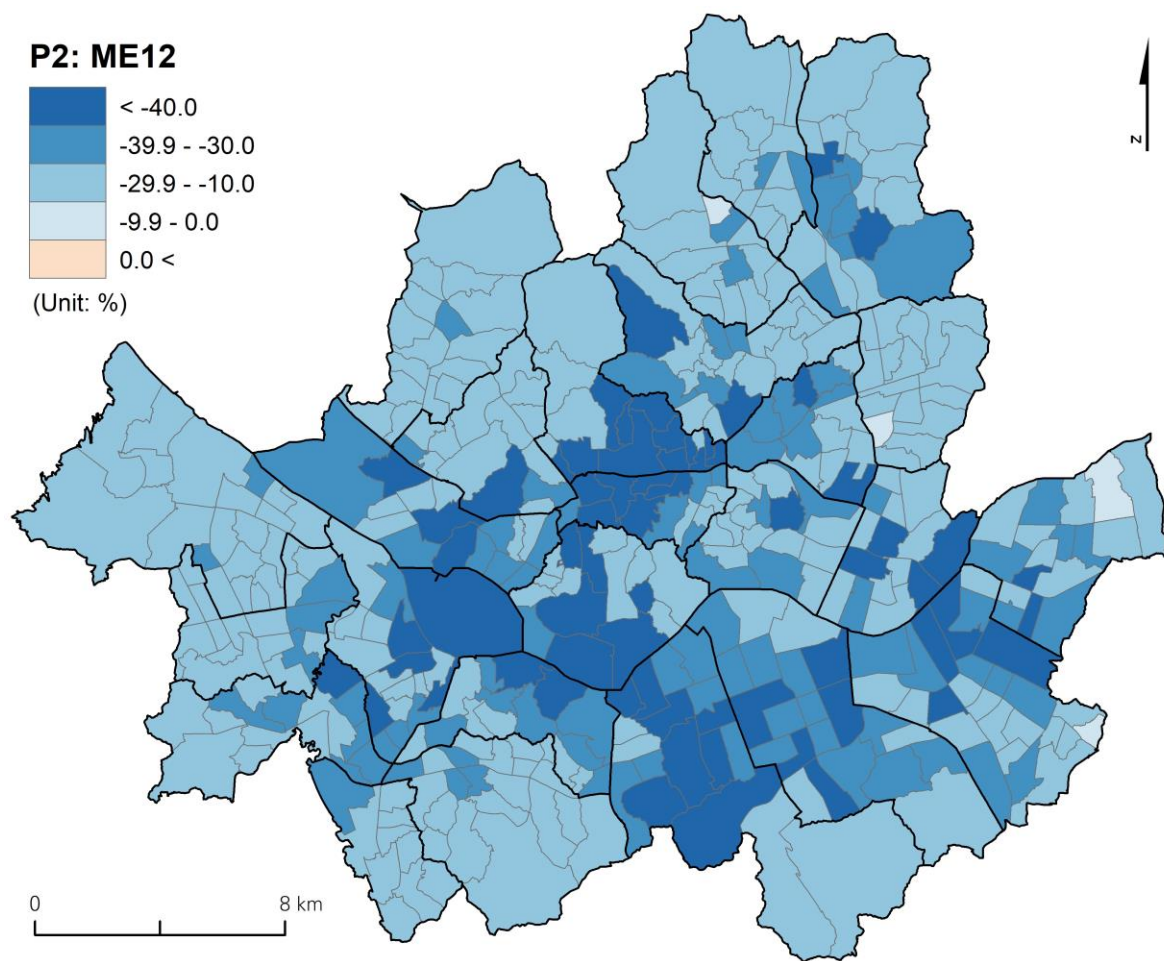

**Figure S21**

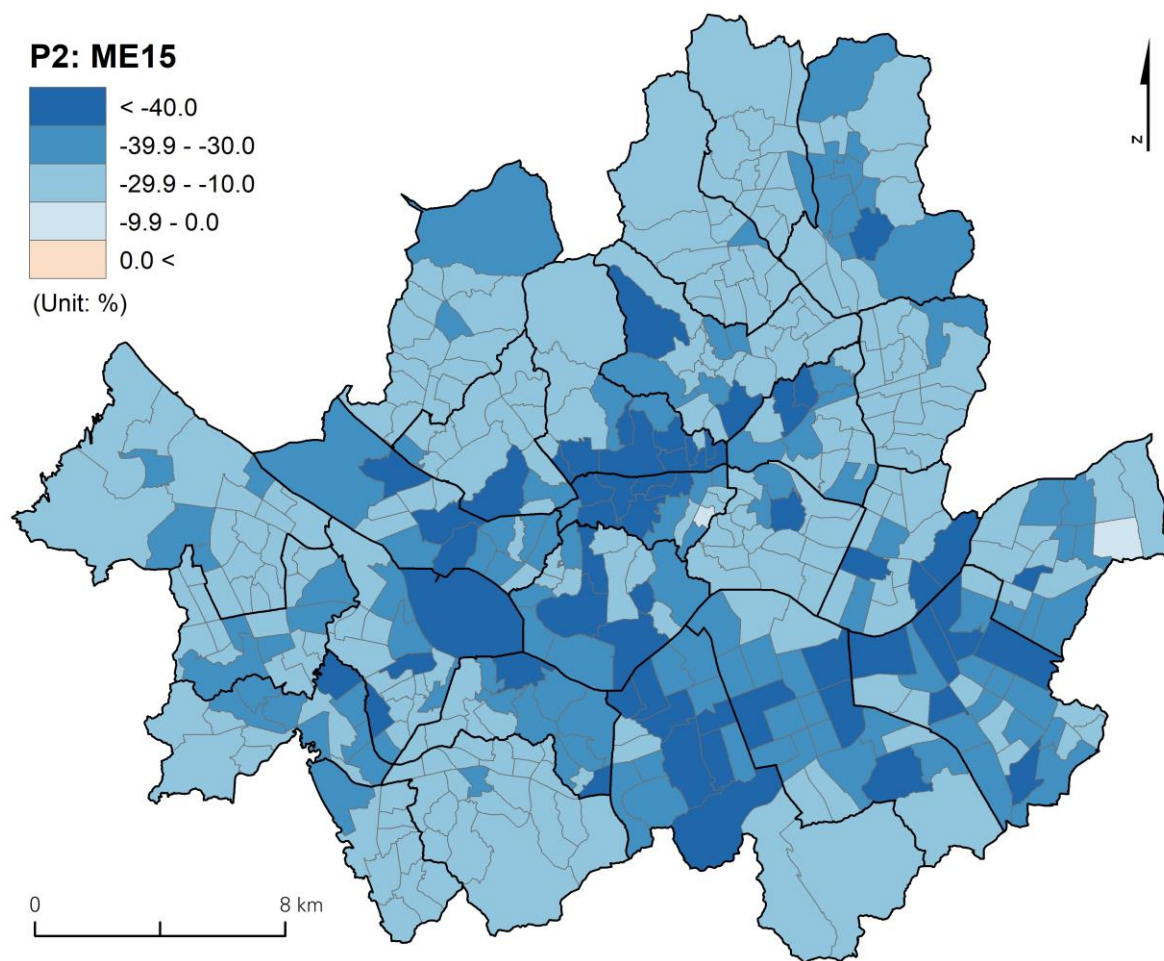

**Figure S22**

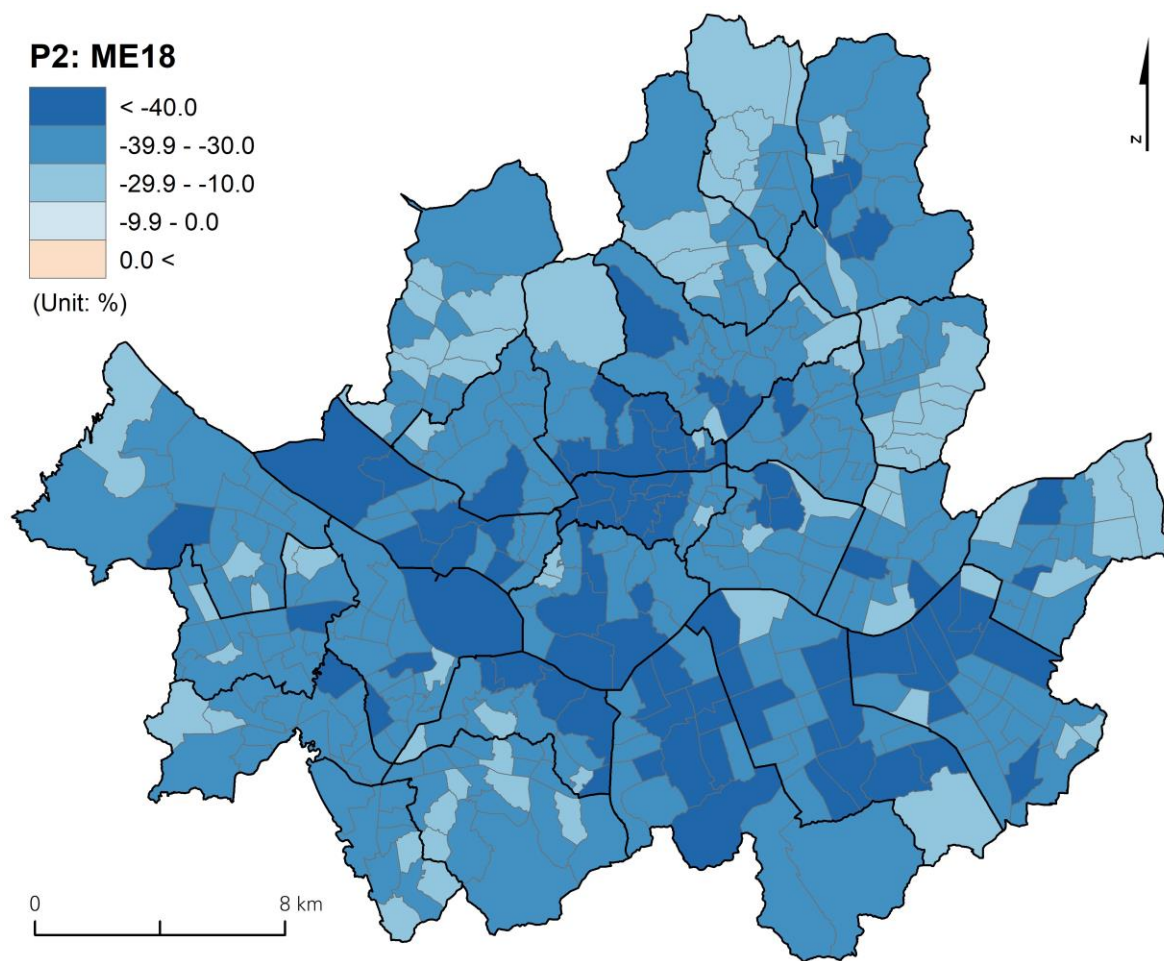

**Figure S23**

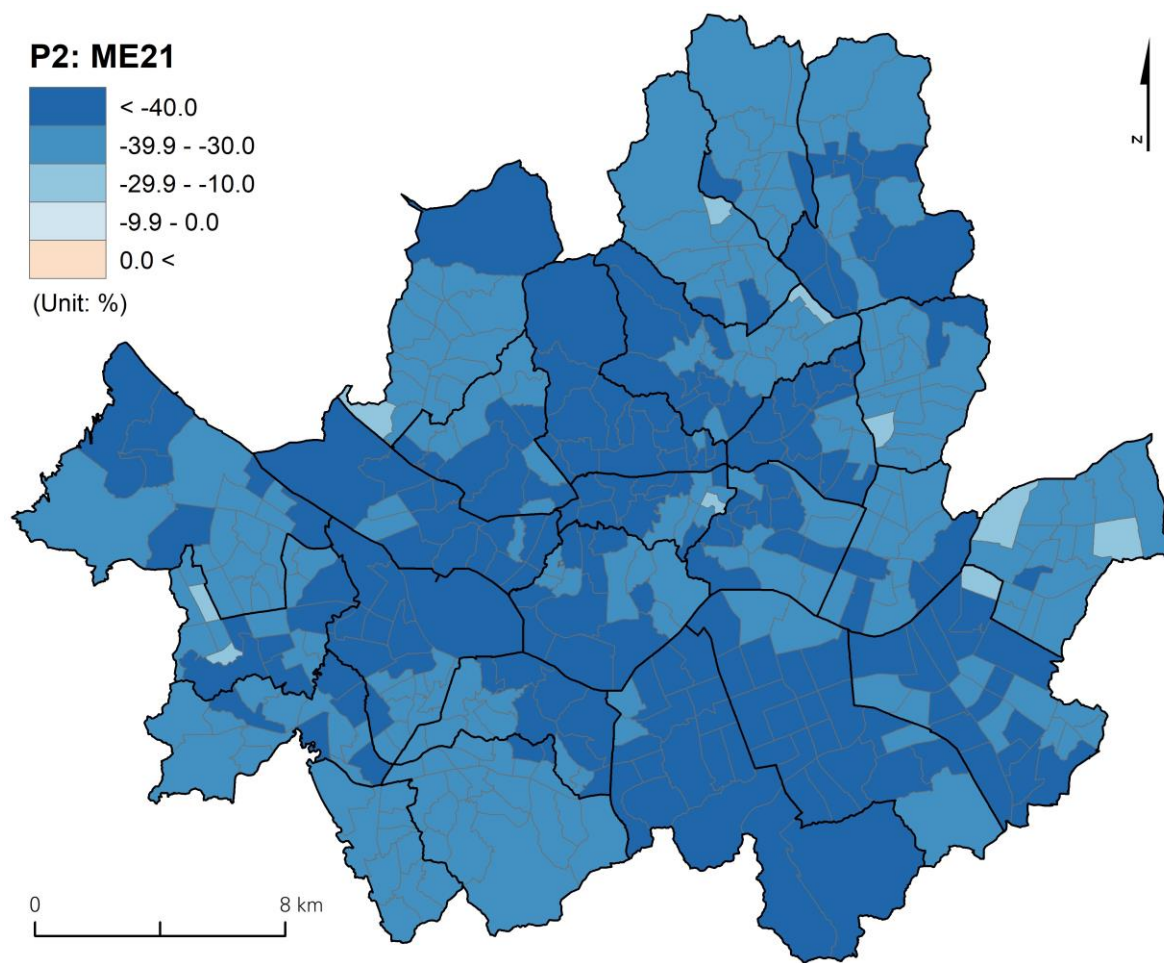

**Figure S24**
